# Supplementary material
Source: publisher figshare collection journal article supplement (https://karger.figshare.com/articles/dataset/_/9923948)

Supplement Figure 1: The intensity of Gd-IgA1 in glomerular mesangial areas.

A, weak; B, mild; C, moderate; D. Severe.

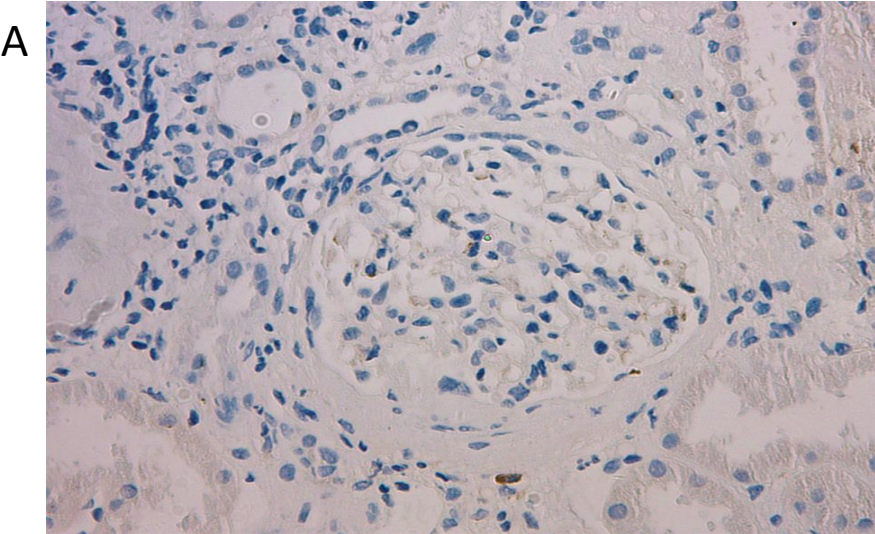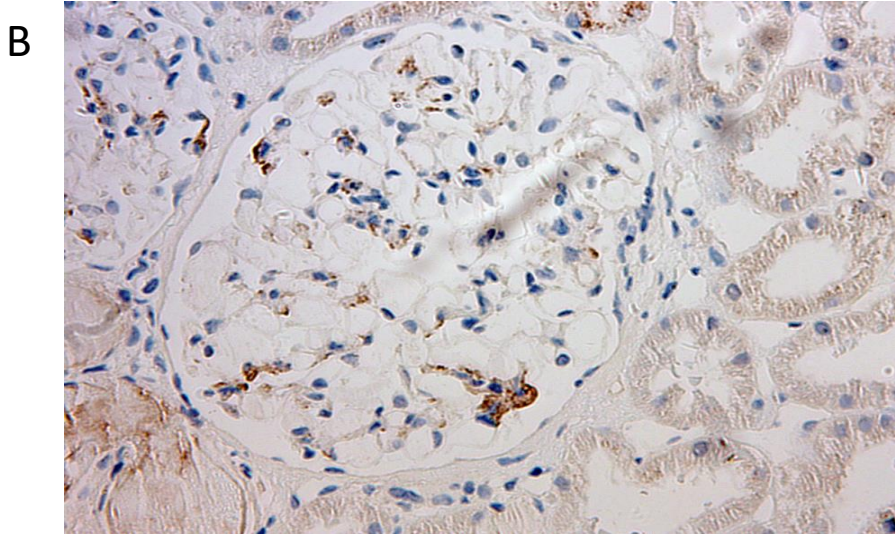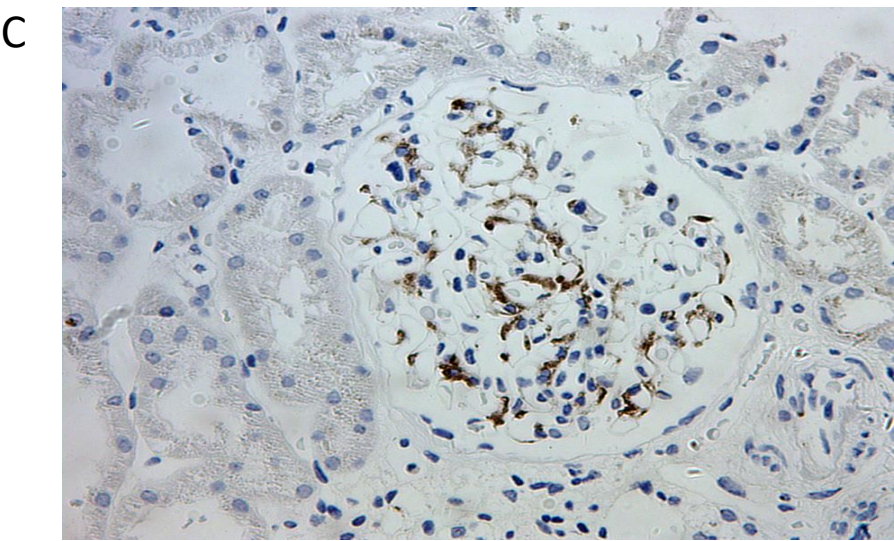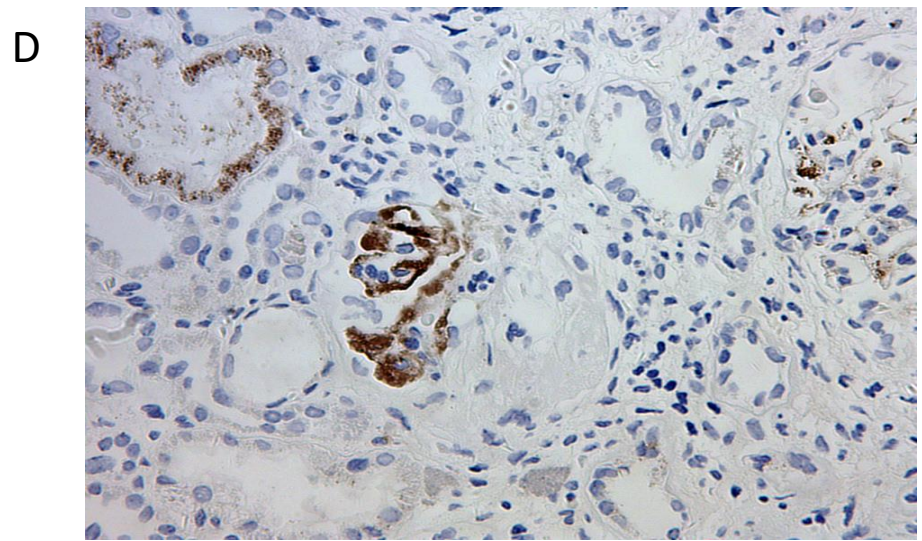

Supplement: Supplementary file 2 [file 1]
