# Supplementary material
Source: publisher figshare collection journal article supplement (https://karger.figshare.com/articles/dataset/_/9923948)

Supplement Figure 2: Correlation analysis of eGFR and plasma uric acid in IgAN patients.

**$r = -0.133, p = 0.257$**

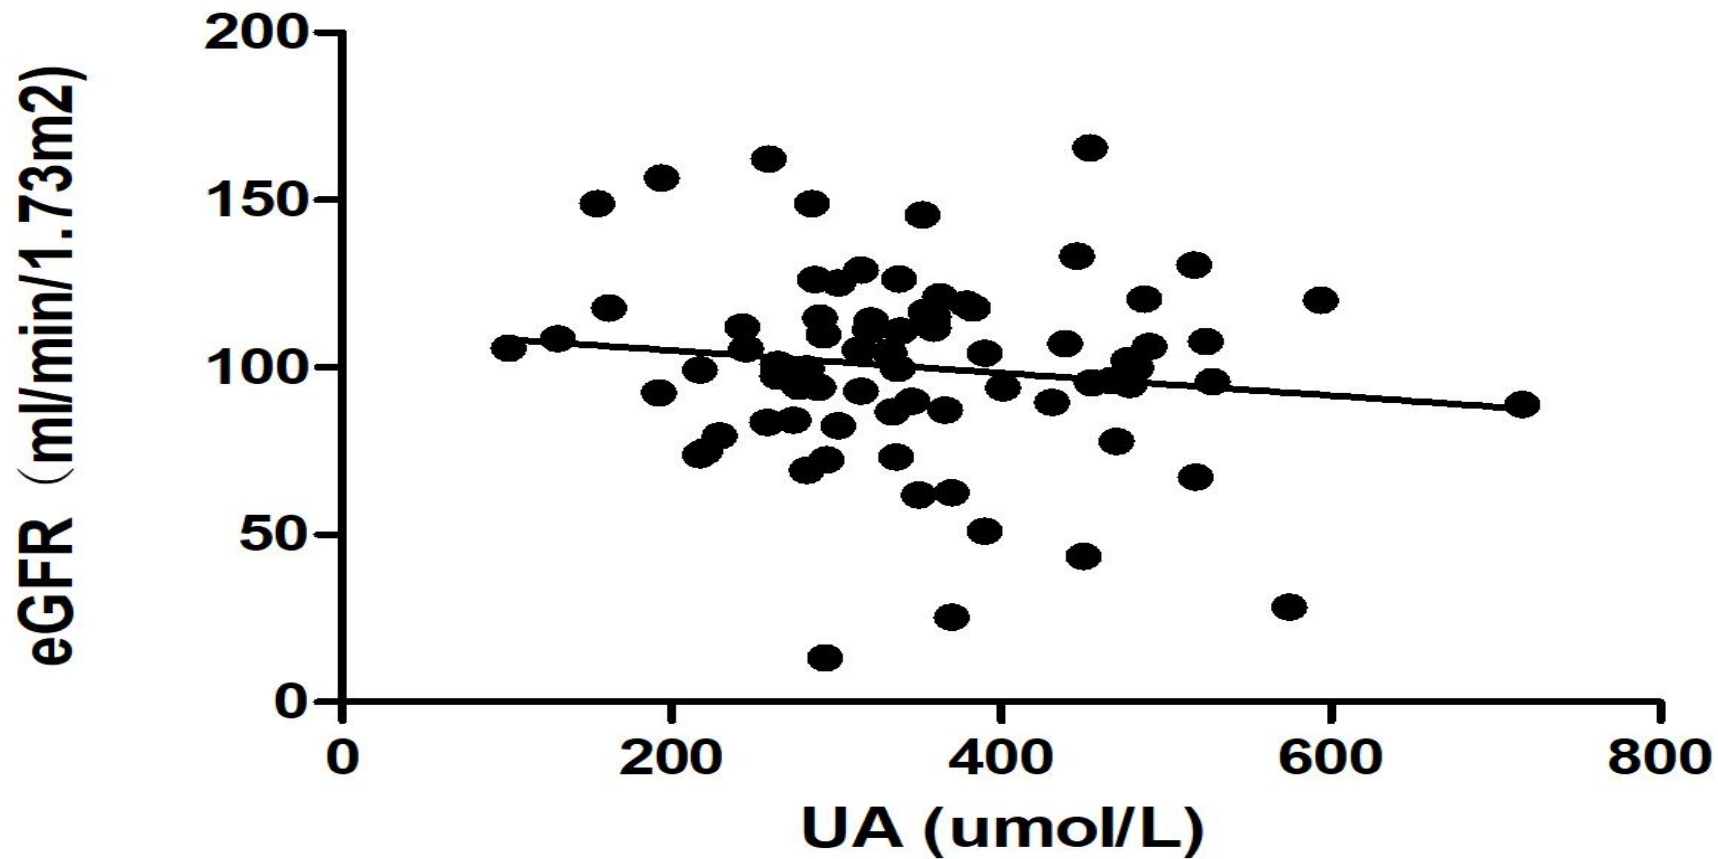

Supplement: Supplementary file 1 [file 1]
